# Supplementary material for: Novel n-3 Immunoresolvents: Structures and Actions
Source: PubMed Central journal article supplement — Sci Rep. 2013 Jun 5;3:1940. doi: 10.1038/srep01940 (PMC3672887; doi:10.1038/srep01940), 2013-06-05

## Supplementary Information

### **Novel n-3 Immunoresolvents: Structures and Actions**

Jesmond Dalli, Romain A. Colas and Charles N. Serhan

<sup>1</sup>Center for Experimental Therapeutics and Reperfusion Injury, Department of Anesthesiology, Perioperative and Pain Medicine, Harvard Institutes of Medicine, Brigham and Women's Hospital and Harvard Medical School, Boston, Massachusetts. 02115.

**Supplementary Figure 1: MS-MS spectra employed for identification of n-3 DPA**

**monohydroxy products in mouse plasma.** Mice were subjected to ischemia reperfusion injury (see Methods for details). Two h into reperfusion, blood was collected via cardiac puncture and the plasma was obtained by centrifugation, products were extracted and n-3 DPA monohydroxy products were assessed by lipid mediator metabololipidomics. Representative MS-MS spectra used for identification of (a) 17-HDPA, (b) 14-HDPA, and (c) 7-HDPA. Results are representative of n=4.

**Supplementary Figure 2: Chiral lipid mediator metabololipidomics of isobaric monohydroxy-containing acids from n-3 DPA in murine plasma with ischemia**

**reperfusion.** In order to detect and quantify each positional isomer without ambiguity, an MRM method was established. Signature daughter ions for each monohydroxy acid (parent m/z, 345) were as follows: 17-HDPA – m/z 245, 14-HDPA – m/z 207 and 7-HDPA – m/z 143. For each enantiomer pair, the R isomer was eluted before S isomers. The signature ion for each species was unique; only two (R and S isomers) peaks are present on each extracted ion chromatogram. Results are representative of n=3.

**Supplementary Figure 3: n-3 DPA resolvins: physical properties.** (a-f) HPLC retention times, online UV, fragment assignments shown in inset, and tandem mass spectra for (a,b) RvD2<sub>n-3 DPA</sub>, (c,d) RvD1<sub>n-3 DPA</sub>, and (e,f) RvD5<sub>n-3 DPA</sub>.

**Supplementary Figure 4: n-3 DPA protectins: physical properties.** (a–f) HPLC retention times, online UV, fragment assignments (inset), and tandem mass spectra for (a,b) PD1<sub>n-3 DPA</sub> and (c,d) PD2<sub>n-3 DPA</sub>.

**Supplementary Figure 5: n-3 DPA maresins: physical properties.** (a-f) HPLC retention times, online UV, fragment assignments (inset), and tandem mass spectra for (a,b) MaR1<sub>n-3 DPA</sub>, (c,d) MaR2<sub>n-3 DPA</sub>, and (e,f) MaR3<sub>n-3 DPA</sub>.

**Supplementary Figure 6: n-3 DPA specialized pro-resolving mediators regulate endothelial ICAM-1 expression.** HUVEC were incubated with vehicle (0.1% EtOH in PBS) or n-3 DPA products (1nM, 15min, 37°C, pH7.45) and then incubated with TNF- $\alpha$  (10ng/ml, 4h, 37°C, 0.1% FSC). ICAM-1 levels were then assessed by flow cytometry using a fluorescently labeled mouse anti-human ICAM-1 antibody. The ratio of RvD1<sub>n-3 DPA</sub> to RvD2<sub>n-3 DPA</sub> (A) was ~3:1; the ratio of RvD5<sub>n-3 DPA</sub> to PD1<sub>n-3 DPA</sub> (B) was ~9:1; the ratio of PD1<sub>n-3 DPA</sub> to PD2<sub>n-3 DPA</sub> (C) was ~1:5. Results are mean  $\pm$  SEM. n = 4 independent neutrophil and endothelial cell preparations (\**P* <0.05; \*\**P* <0.05 vs. vehicle incubated cells).

a

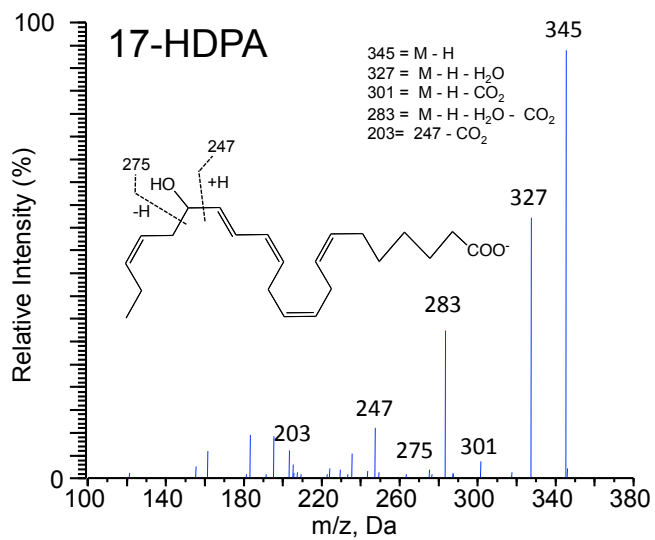

b

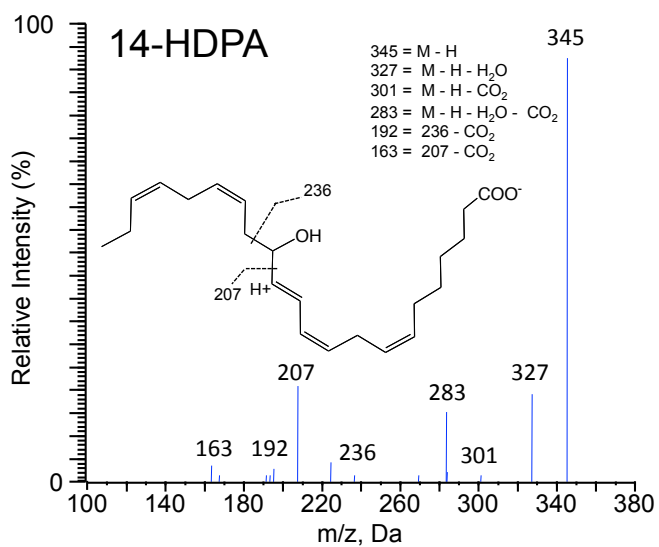

c

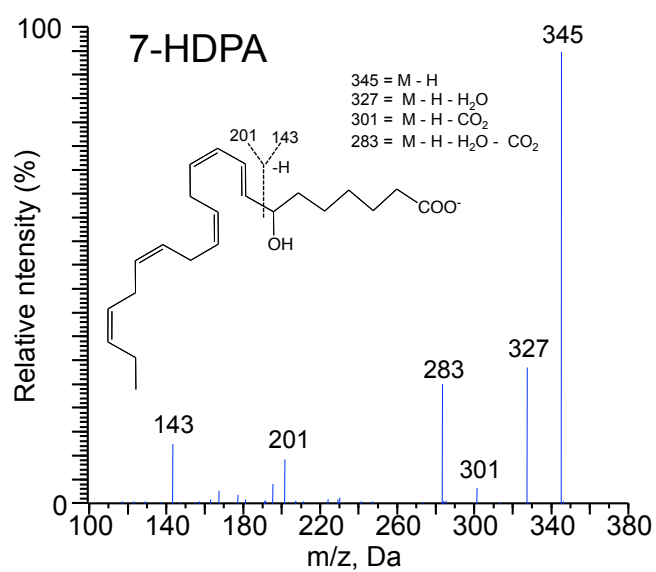

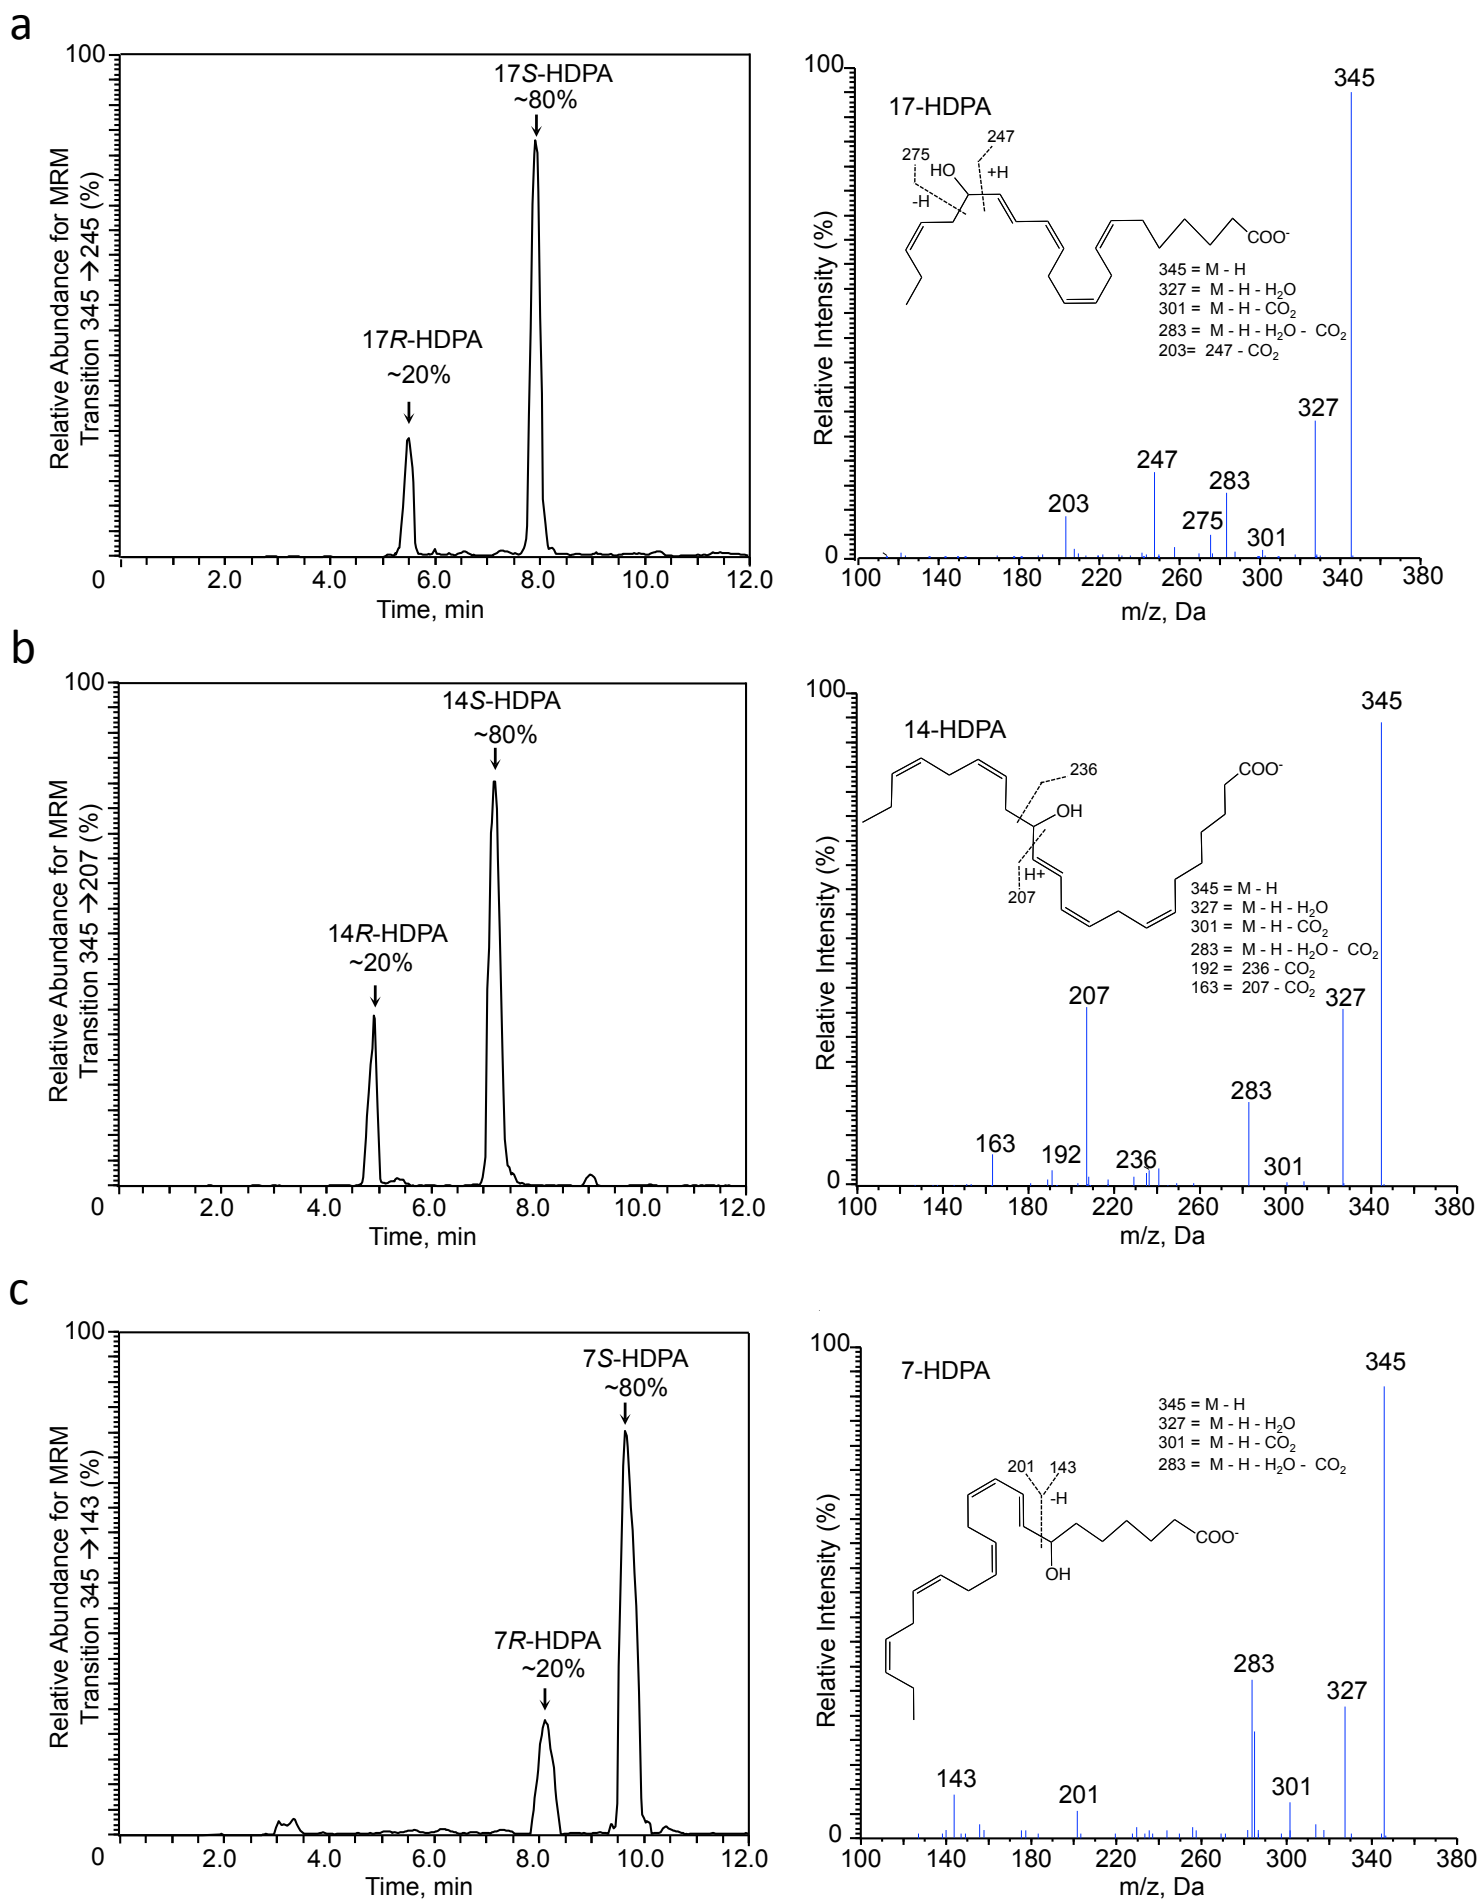

a

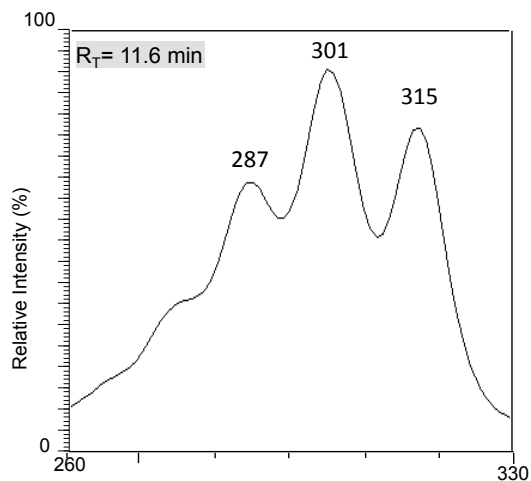

b

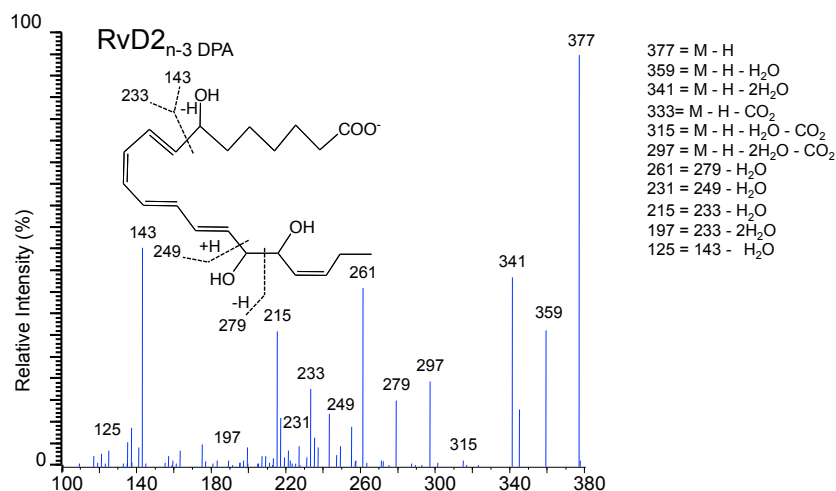

c

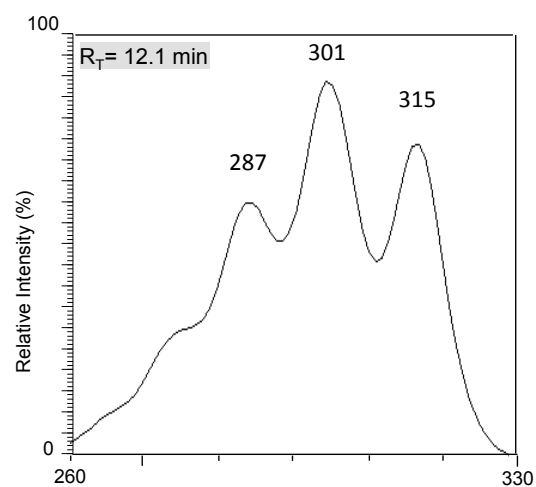

d

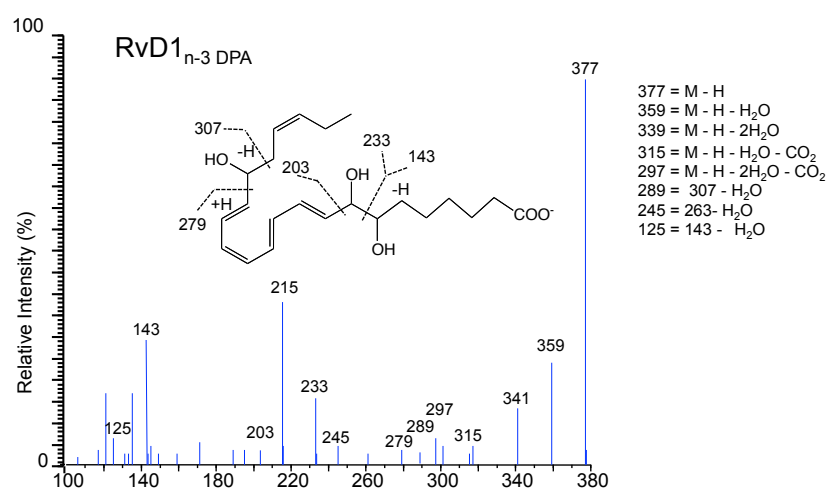

e

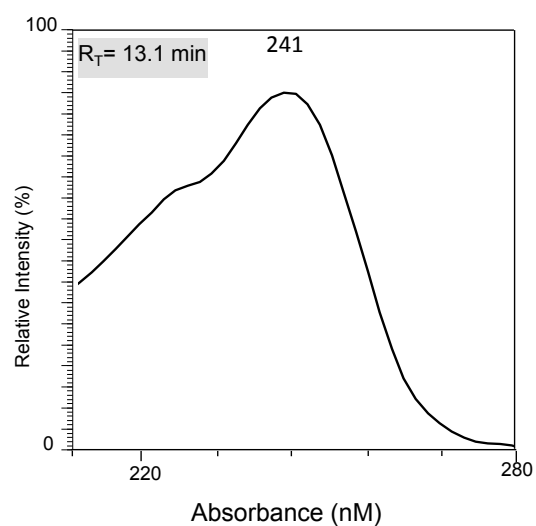

f

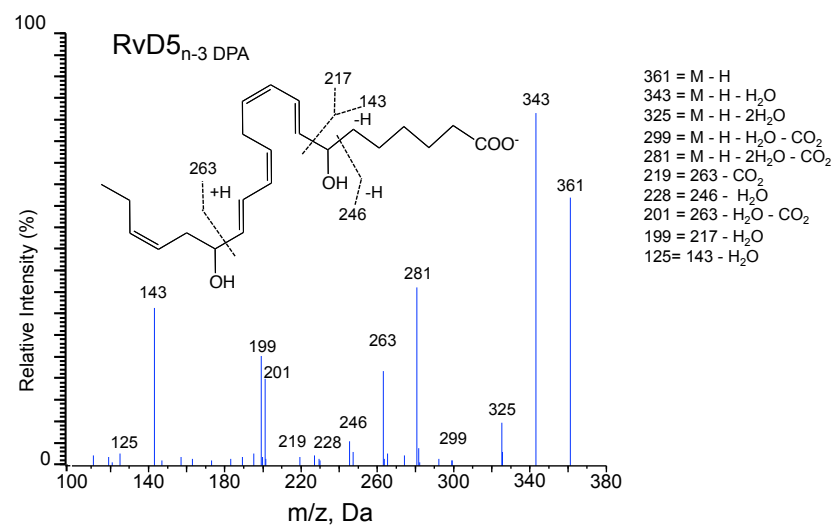

Supplementary Figure 4

a

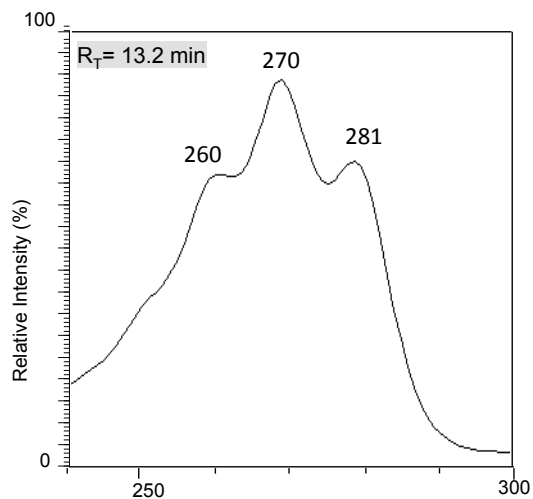

b

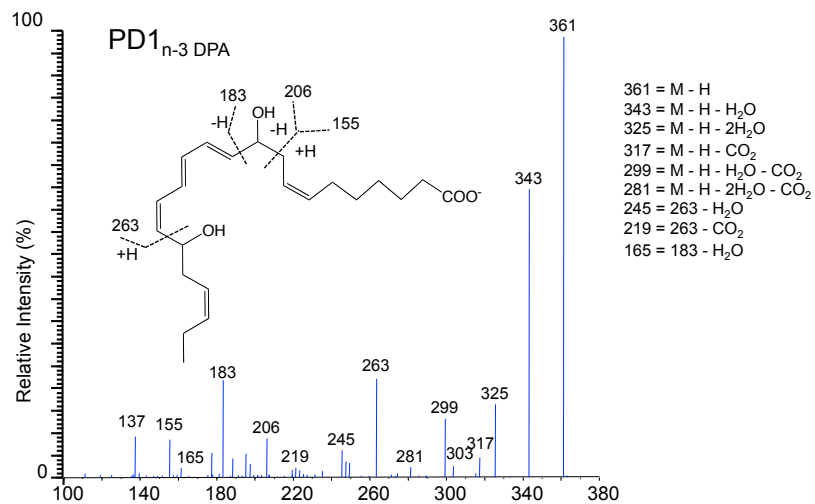

d

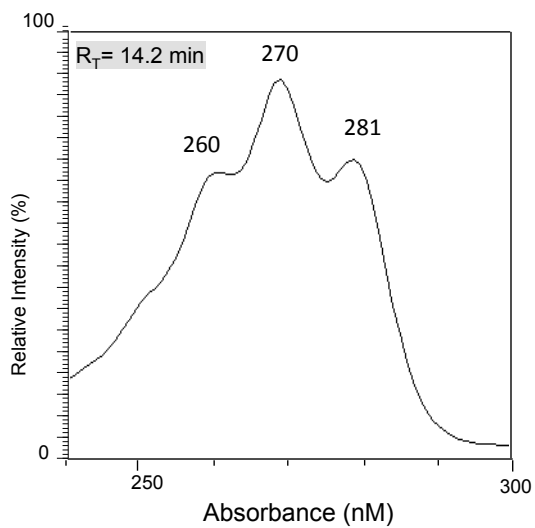

d

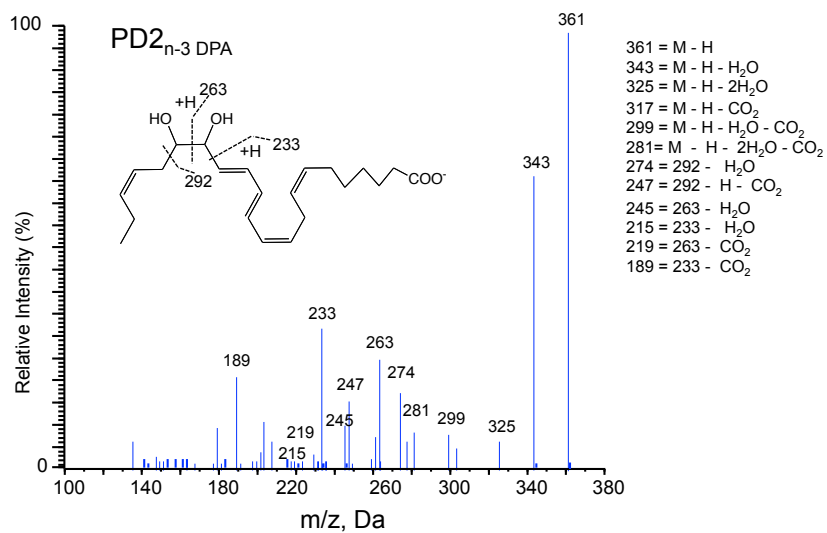

a

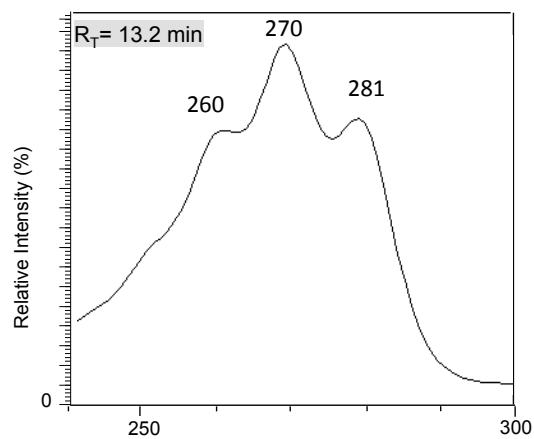

b

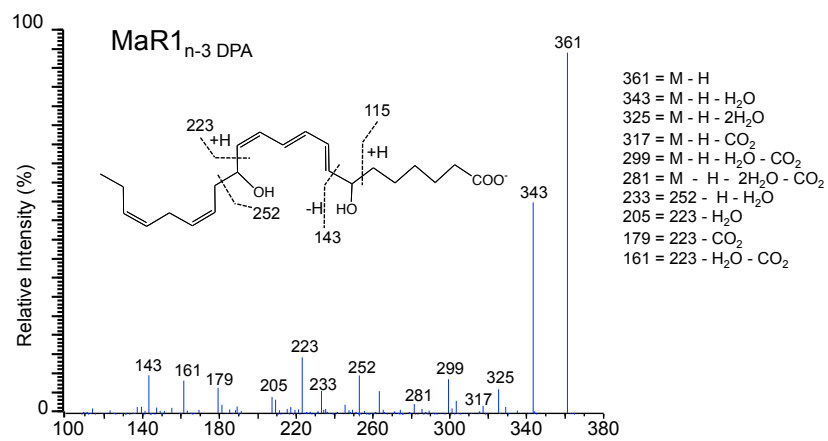

c

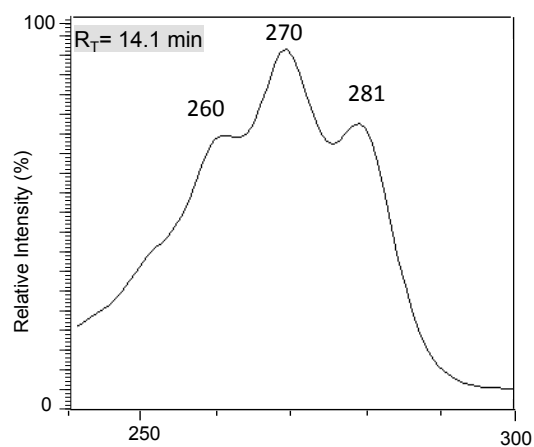

d

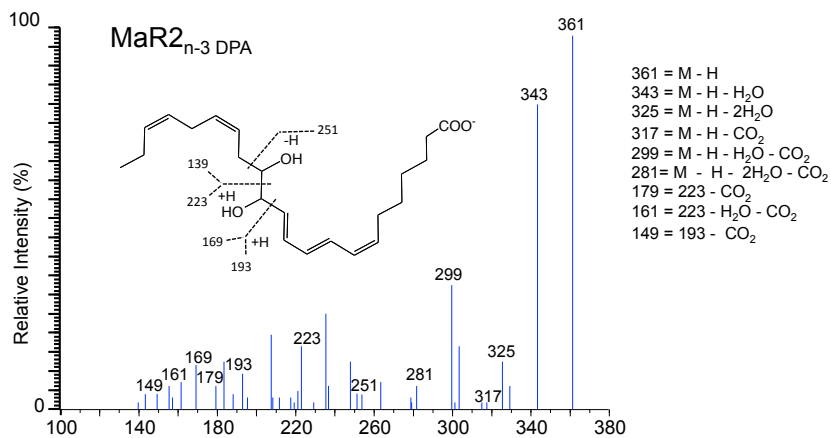

e

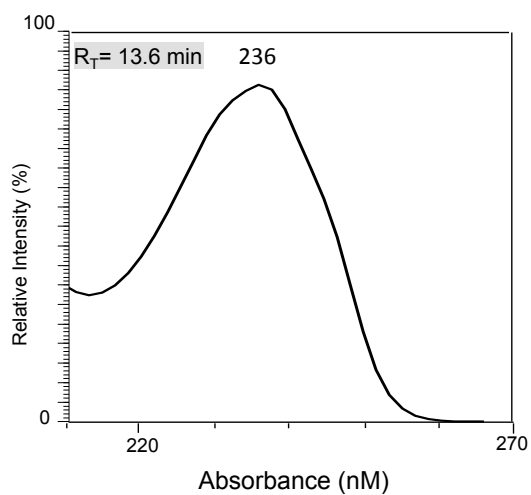

f

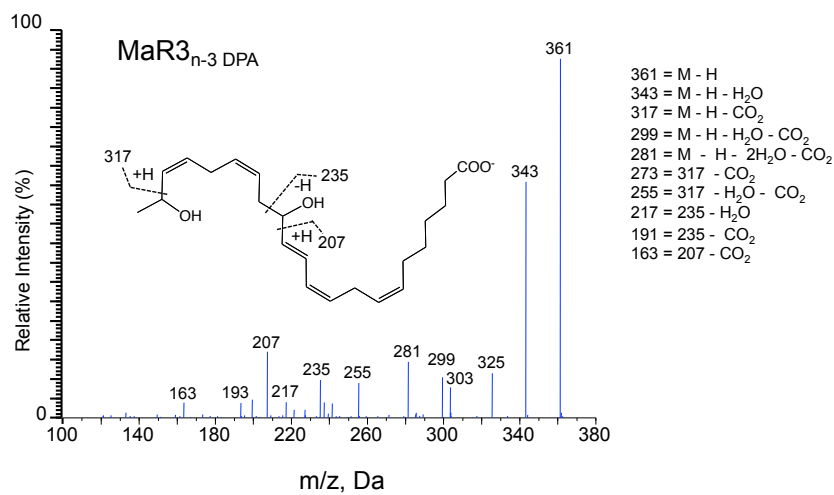



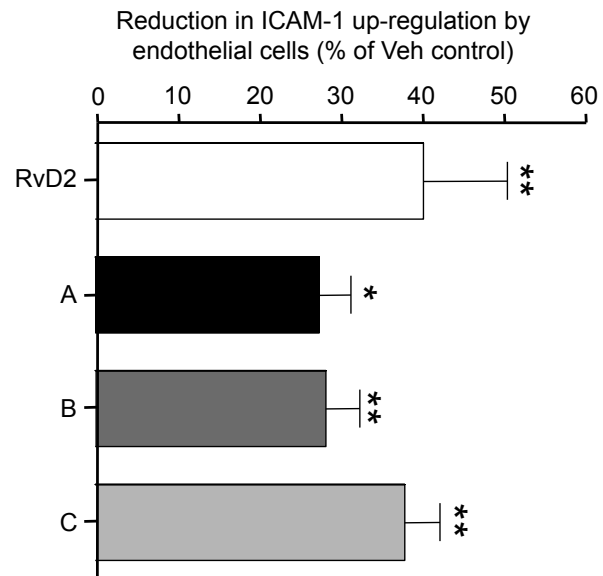

Supplement: srep01940-s1.pdf [file srep01940-s1.pdf]
